# Supplementary material for: Thermodynamic and spectroscopic investigation on the role of Met residues in CuII binding to the non-octarepeat site of the human prion protein
Source: Royal Society of Chemistry journal article supplement (doi:10.1039/c2mt20060k), 2012-01-01

# Thermodynamic and spectroscopic investigation on the role of Met residues in Cu<sup>II</sup> binding to the non-octarepeat site of the human Prion protein

Maurizio Remelli,<sup>1a</sup> Daniela Valensin,<sup>\*b</sup> Leonardo Toso,<sup>a</sup> Ewa Gralka,<sup>c</sup> Remo Guerrini,<sup>d</sup> Erika Marzola<sup>d</sup> and Henryk Kozłowski<sup>c</sup>

[a] *Dipartimento di Chimica, Università di Ferrara, via L. Borsari 46, 44121 Ferrara, Italia. Fax: +39 0532 240709. E-mail: maurizio.remelli@unife.it*

[b] *Dipartimento di Chimica, Università di Siena, Via A. Moro 2, 53100 Siena, Italia. Fax: +39 0577234233. E-mail: daniela.valensin@unisi.it*

[c] *Faculty of Chemistry, University of Wrocław, F. Joliot-Curie 14, 50383 Wrocław, Poland*

[d] *Dipartimento di Scienze Farmaceutiche, Università di Ferrara, via Fossato di Mortara 17/19, 44121 Ferrara, Italia*

---

<sup>1</sup> Corresponding author.

## SUPPLEMENTARY INFORMATION

**Tab. S1** - Spectroscopic parameters of Cu(II) complexes at 25 °C in aqueous solution.

| Main species                                                       | pH                        | UV/Vis                     |                                        | CD                  |                                              | EPR               |                 |
|--------------------------------------------------------------------|---------------------------|----------------------------|----------------------------------------|---------------------|----------------------------------------------|-------------------|-----------------|
|                                                                    |                           | $\lambda_{\max}/\text{nm}$ | $\epsilon/\text{M}^{-1}\text{cm}^{-1}$ | $\lambda/\text{nm}$ | $\Delta\epsilon/\text{M}^{-1}\text{cm}^{-1}$ | $A_{\parallel}/G$ | $g_{\parallel}$ |
| <i>hPrP106-113</i> <sup>(a)</sup>                                  |                           |                            |                                        |                     |                                              |                   |                 |
| <b>Cu<sup>2+</sup>, [CuLH<sub>2</sub>]<sup>4+</sup></b>            | <b>5.0</b>                | 789                        | 18                                     | 260                 | +0.12                                        | 120               | 2.41            |
|                                                                    | <b>[CuL]<sup>2+</sup></b> | <b>6.5</b>                 | 614                                    | 86                  | 255                                          | +2.19             | 163             |
| 329                                                                |                           |                            |                                        |                     | -0.17                                        |                   |                 |
| 532                                                                |                           |                            |                                        |                     | +0.11                                        |                   |                 |
| 615                                                                |                           |                            |                                        |                     | -0.01                                        |                   |                 |
| 256                                                                |                           |                            |                                        |                     | +2.25                                        |                   |                 |
| <b>[CuL]<sup>2+</sup></b><br><b>[CuLH<sub>1</sub>]<sup>+</sup></b> | <b>7.5</b>                | 607*                       | 87*                                    | 256                 | +2.25                                        | 164               | 2.22            |
|                                                                    |                           |                            |                                        | 308 (sh)            | +0.08                                        |                   |                 |
|                                                                    |                           |                            |                                        | 344                 | -0.05                                        |                   |                 |
|                                                                    |                           |                            |                                        | 392                 | +0.02                                        |                   |                 |
|                                                                    |                           |                            |                                        | 484                 | -0.09                                        |                   |                 |
| <b>[CuLH<sub>1</sub>]<sup>+</sup></b>                              | <b>8.5</b>                | 569                        | 82                                     | 557 (sh)            | +0.04                                        | 179               | 2.20            |
|                                                                    |                           |                            |                                        | 633                 | +0.10                                        |                   |                 |
|                                                                    |                           |                            |                                        | 256                 | +2.27                                        |                   |                 |
|                                                                    |                           |                            |                                        | 316                 | +0.31                                        |                   |                 |
|                                                                    |                           |                            |                                        | 367                 | -0.03                                        |                   |                 |
| <b>[CuLH<sub>1</sub>]<sup>+</sup></b>                              | <b>9.0</b>                | 534                        | 105                                    | 493                 | -0.28                                        | 183               | 2.19            |
|                                                                    |                           |                            |                                        | 628                 | 0.25                                         |                   |                 |
|                                                                    |                           |                            |                                        | 257                 | +2.29                                        |                   |                 |
|                                                                    |                           |                            |                                        | 316                 | +0.38                                        |                   |                 |
|                                                                    |                           |                            |                                        | 360                 | -0.03                                        |                   |                 |
| <b>[CuLH<sub>2</sub>]</b>                                          | <b>10.0</b>               | 524                        | 105                                    | 494                 | -0.32                                        | 182               | 2.19            |
|                                                                    |                           |                            |                                        | 626                 | +0.29                                        |                   |                 |
|                                                                    |                           |                            |                                        | 257                 | +2.32                                        |                   |                 |
|                                                                    |                           |                            |                                        | 316                 | +0.42                                        |                   |                 |
|                                                                    |                           |                            |                                        | 362                 | -0.02                                        |                   |                 |
| <b>[CuLH<sub>3</sub>]<sup>-</sup></b>                              | <b>11.0</b>               | 532                        | 107                                    | 494                 | -0.36                                        | 184               | 2.19            |
|                                                                    |                           |                            |                                        | 627                 | +0.31                                        |                   |                 |
|                                                                    |                           |                            |                                        | 257                 | +2.37                                        |                   |                 |
|                                                                    |                           |                            |                                        | 318                 | +0.42                                        |                   |                 |
|                                                                    |                           |                            |                                        | 494                 | -0.39                                        |                   |                 |
|                                                                    |                           |                            |                                        | 628                 | +0.33                                        |                   |                 |
| <i>(M109n-Leu)hPrP106-113</i>                                      |                           |                            |                                        |                     |                                              |                   |                 |
| <b>Cu<sup>2+</sup>, [CuLH<sub>2</sub>]<sup>4+</sup></b>            | <b>5.5</b>                | n. d.                      | n. d.                                  | 254                 | +0.59                                        | 118               | 2.42            |
|                                                                    |                           |                            |                                        | 343                 | -0.06                                        | 133               | 2.36            |
| <b>[CuL]<sup>2+</sup></b>                                          | <b>6.6</b>                | n. d.                      | n. d.                                  | 525                 | +0.06                                        | 169               | 2.22            |
|                                                                    |                           |                            |                                        | 251                 | +8.51                                        |                   |                 |
|                                                                    |                           |                            |                                        | 346                 | -0.75                                        |                   |                 |
|                                                                    |                           |                            |                                        | 531                 | +0.50                                        |                   |                 |
|                                                                    |                           |                            |                                        | 627                 | -0.14                                        |                   |                 |
| <b>[CuL]<sup>2+</sup></b>                                          | <b>7.0</b>                | n. d.                      | n. d.                                  | 251                 | +9.29                                        | 173               | 2.30            |
|                                                                    |                           |                            |                                        | 346                 | -0.75                                        |                   |                 |
|                                                                    |                           |                            |                                        | 535                 | +0.46                                        |                   |                 |
|                                                                    |                           |                            |                                        | 628                 | -0.05                                        |                   |                 |
|                                                                    |                           |                            |                                        | 256                 | +8.64                                        |                   |                 |
| <b>[CuLH<sub>1</sub>]<sup>+</sup></b>                              | <b>8.5</b>                | n. d.                      | n. d.                                  | 3.13                | +1.06                                        | 194               | 2.19            |
|                                                                    |                           |                            |                                        | 355                 | -0.30                                        |                   |                 |
|                                                                    |                           |                            |                                        | 491                 | -1.00                                        |                   |                 |
|                                                                    |                           |                            |                                        | 628                 | +0.88                                        |                   |                 |
|                                                                    |                           |                            |                                        | 257                 | +8.60                                        |                   |                 |
| <b>[CuLH<sub>1</sub>]<sup>+</sup></b>                              | <b>9.0</b>                | n. d.                      | n. d.                                  | 314                 | +1.26                                        | 195               | 2.20            |
|                                                                    |                           |                            |                                        | 357                 | -0.23                                        |                   |                 |
|                                                                    |                           |                            |                                        | 491                 | -1.22                                        |                   |                 |
|                                                                    |                           |                            |                                        | 628                 | +1.05                                        |                   |                 |
|                                                                    |                           |                            |                                        | 257                 | +8.60                                        |                   |                 |
| <b>[CuLH<sub>2</sub>]</b>                                          | <b>10.0</b>               | n. d.                      | n. d.                                  | 315                 | +1.36                                        | 195               | 2.19            |
|                                                                    |                           |                            |                                        | 358                 | -0.19                                        |                   |                 |
|                                                                    |                           |                            |                                        | 492                 | -1.35                                        |                   |                 |
|                                                                    |                           |                            |                                        | 628                 | +1.15                                        |                   |                 |
|                                                                    |                           |                            |                                        | 257                 | +8.73                                        |                   |                 |
| <b>[CuLH<sub>3</sub>]<sup>-</sup></b>                              | <b>11.0</b>               | n. d.                      | n. d.                                  | 316                 | +1.33                                        | 194               | 2.19            |
|                                                                    |                           |                            |                                        |                     |                                              |                   |                 |

|                                                         |             |          |     |          |       |       |       |
|---------------------------------------------------------|-------------|----------|-----|----------|-------|-------|-------|
|                                                         |             |          |     | 360      | -0.16 |       |       |
|                                                         |             |          |     | 493      | -1.43 |       |       |
|                                                         |             |          |     | 629      | +1.21 |       |       |
| <i>(M109,112n-Leu)hPrP106-113</i>                       |             |          |     |          |       |       |       |
| <b>Cu<sup>2+</sup>, [CuLH<sub>2</sub>]<sup>4+</sup></b> | <b>5.5</b>  | 705      | 26  | 252      | +3.66 | 118   | 2.42  |
|                                                         |             |          |     | 346      | -0.37 | 129   | 2.36  |
|                                                         |             |          |     | 523      | +0.23 |       |       |
|                                                         |             |          |     | 620      | -0.08 |       |       |
| <b>[CuLH<sub>2</sub>]<sup>4+</sup></b>                  | <b>6.0</b>  | 605      | 73  | 250      | +9.10 | 119   | 2.41  |
| <b>[CuLH]<sup>3+</sup></b>                              |             |          |     | 347      | -0.80 | 131   | 2.36  |
| <b>[CuL]<sup>2+</sup></b>                               |             |          |     | 527      | +0.39 |       |       |
|                                                         |             |          |     | 613      | -0.07 |       |       |
| <b>[CuL]<sup>2+</sup></b>                               | <b>7.0</b>  | 595      | 112 | 254      | +8.86 | 166   | 2.23  |
|                                                         |             |          |     | 308 (sh) | +0.88 |       |       |
|                                                         |             |          |     | 351      | -0.51 |       |       |
|                                                         |             |          |     | 485      | -0.47 |       |       |
|                                                         |             |          |     | 629      | +0.47 |       |       |
| <b>[CuL]<sup>2+</sup></b>                               | <b>8.0</b>  | 535      | 151 | 257      | +8.37 | 171   | 2.22  |
| <b>[CuLH<sub>1</sub>]<sup>+</sup></b>                   |             |          |     | 314      | +1.30 |       |       |
|                                                         |             |          |     | 358      | -0.26 |       |       |
|                                                         |             |          |     | 491      | -1.10 |       |       |
|                                                         |             |          |     | 627      | +0.97 |       |       |
| <b>[CuLH<sub>1</sub>]<sup>+</sup></b>                   | <b>9.0</b>  | 534      | 166 | 257      | +8.51 | 187   | 2.20  |
|                                                         |             |          |     | 316      | +1.33 |       |       |
|                                                         |             |          |     | 359      | -0.18 |       |       |
|                                                         |             |          |     | 494      | -1.28 |       |       |
|                                                         |             |          |     | 630      | +1.13 |       |       |
| <b>[CuLH<sub>2</sub>]</b>                               | <b>10.5</b> | 528      | 177 | 258      | +8.69 | 190   | 2.20  |
|                                                         |             |          |     | 317      | +1.36 |       |       |
|                                                         |             |          |     | 360      | -0.17 |       |       |
|                                                         |             |          |     | 494      | -1.34 |       |       |
|                                                         |             |          |     | 630      | +1.15 |       |       |
| <i>Ac-HMAGAA-NH<sub>2</sub><sup>(b)</sup></i>           |             |          |     |          |       |       |       |
| <b>[CuL]<sup>2+</sup></b>                               | <b>6.0</b>  | 760      | 17  | 220      | 4.44  | 159   | 2.31  |
|                                                         |             |          |     | 225      | -1.35 |       |       |
|                                                         |             |          |     | 260      | 0.03  |       |       |
| <b>[CuLH<sub>2</sub>]</b>                               | <b>8.0</b>  | 623      | 81  | 250      | 2.69  | 177   | 2.21  |
|                                                         |             |          |     | 301      | -0.25 |       |       |
|                                                         |             |          |     | 340      | 0.08  |       |       |
|                                                         |             |          |     | 610      | -0.51 |       |       |
| <b>[CuLH<sub>3</sub>]<sup>-</sup></b>                   | <b>10.0</b> | 565      | 100 | 252      | 6.86  | 187   | 2.19  |
|                                                         |             |          |     | 303 (sh) | 0.16  |       |       |
|                                                         |             |          |     | 340      | -0.54 |       |       |
|                                                         |             |          |     | 512      | -0.48 |       |       |
|                                                         |             |          |     | 664      | -0.25 |       |       |
| <b>[CuLH<sub>4</sub>]<sup>2-</sup></b>                  | <b>11.0</b> | 538      | 107 | 251      | 6.47  | 191   | 2.19  |
|                                                         |             |          |     | 303 (sh) | 0.07  |       |       |
|                                                         |             |          |     | 340      | -0.52 |       |       |
|                                                         |             |          |     | 520      | -0.49 |       |       |
|                                                         |             |          |     | 658      | -0.24 |       |       |
| <i>Ac-HMAGA-NH<sub>2</sub></i>                          |             |          |     |          |       |       |       |
| <b>[CuL]<sup>2+</sup></b>                               | <b>6.0</b>  | 740      | 27  | n. d.    | n. d. | n. d. | n. d. |
| <b>[CuLH<sub>2</sub>]</b>                               | <b>8.0</b>  | 625      | 90  | n. d.    | n. d. | n. d. | n. d. |
| <b>[CuLH<sub>3</sub>]<sup>-</sup></b>                   | <b>11.0</b> | 538      | 118 | n. d.    | n. d. | n. d. | n. d. |
| <i>Ac-H(n-L)AGA-NH<sub>2</sub></i>                      |             |          |     |          |       |       |       |
| <b>[CuL]<sup>2+</sup></b>                               | <b>6.5</b>  | 723      | 29  | 251      | 0.13  | 120   | 2.41  |
|                                                         |             |          |     | 315      | -0.02 | 128   | 2.36  |
|                                                         |             |          |     | 602      | -0.04 |       |       |
| <b>[CuLH<sub>2</sub>]</b>                               | <b>8.0</b>  | 646      | 64  | 252      | 0.82  | 152   | 2.24  |
|                                                         |             |          |     | 308      | -0.06 | 170   | 2.27  |
|                                                         |             |          |     | 350      | 0.03  |       |       |
|                                                         |             |          |     | 604      | -0.22 |       |       |
| <b>[CuLH<sub>3</sub>]<sup>-</sup></b>                   | <b>10.0</b> | 520      | 81  | 254      | 5.41  | 155   | 2.23  |
|                                                         |             | 592 (sh) | -   | 300 (sh) | 1.01  |       |       |
|                                                         |             |          |     | 343      | -0.43 |       |       |
|                                                         |             |          |     | 568      | -0.42 |       |       |
| <b>[CuLH<sub>4</sub>]<sup>2-</sup></b>                  | <b>11.0</b> | 520      | 105 | 253      | 5.47  | 195   | 2.19  |
|                                                         |             |          |     | 300 (sh) | 1.07  |       |       |

|                                        |             |     |     |     |       |      |       |
|----------------------------------------|-------------|-----|-----|-----|-------|------|-------|
|                                        |             |     |     | 343 | -0.43 |      |       |
|                                        |             |     |     | 494 | -0.56 |      |       |
|                                        |             |     |     | 613 | -0.17 |      |       |
| <i>Ac-HMAAA-NH<sub>2</sub></i>         |             |     |     |     |       |      |       |
| <b>[CuL]<sup>2+</sup></b>              | <b>6.5</b>  | 666 | 41  | 255 | 0.21  | 117  | 2.42  |
|                                        |             |     |     | 317 | -0.04 | 128  | 2.36  |
|                                        |             |     |     | 377 | 0.03  |      |       |
|                                        |             |     |     | 599 | -0.08 |      |       |
| <b>[CuLH<sub>2</sub>]</b>              | <b>8.0</b>  | 633 | 96  | 253 | 1.59  | 149  | 2.24  |
|                                        |             |     |     | 305 | -0.16 |      |       |
|                                        |             |     |     | 340 | 0.11  |      |       |
|                                        |             |     |     | 604 | -0.61 |      |       |
| <b>[CuLH<sub>3</sub>]</b>              | <b>10.0</b> | 604 | 117 | 250 | 3.49  | 153  | 2.23  |
|                                        |             |     |     | 320 | 0.29  |      |       |
|                                        |             |     |     | 523 | -0.58 |      |       |
|                                        |             |     |     | 615 | -0.55 |      |       |
| <b>[CuLH<sub>4</sub>]<sup>2-</sup></b> | <b>11.0</b> | 530 | 159 | 242 | 6.04  | 202  | 2.18  |
|                                        |             |     |     | 281 | -0.98 |      |       |
|                                        |             |     |     | 309 | 0.71  |      |       |
|                                        |             |     |     | 502 | -2.30 |      |       |
|                                        |             |     |     | 591 | 0.43  |      |       |
| <i>Ac-HAMAA-NH<sub>2</sub></i>         |             |     |     |     |       |      |       |
| <b>[CuL]<sup>2+</sup></b>              | <b>6.5</b>  | 688 | 38  | 252 | 0.26  | 116  | 2.42  |
|                                        |             |     |     | 316 | -0.13 | 128  | 2.36  |
|                                        |             |     |     | 372 | 0.05  |      |       |
|                                        |             |     |     | 610 | -0.10 |      |       |
| <b>[CuLH<sub>2</sub>]</b>              | <b>8.5</b>  | 635 | 120 | 251 | 1.53  | 157  | 2.24  |
|                                        |             |     |     | 314 | -0.42 |      |       |
|                                        |             |     |     | 368 | 0.24  |      |       |
|                                        |             |     |     | 607 | -0.52 |      |       |
| <b>[CuLH<sub>4</sub>]<sup>2-</sup></b> | <b>11.0</b> | 540 | 158 | 245 | 4.60  | 194  | 2.19  |
|                                        |             |     |     | 290 | -0.15 |      |       |
|                                        |             |     |     | 315 | 0.14  |      |       |
|                                        |             |     |     | 355 | -0.03 |      |       |
|                                        |             |     |     | 510 | -1.21 |      |       |
| <i>Ac-HAAMA-NH<sub>2</sub></i>         |             |     |     |     |       |      |       |
| <b>[CuL]<sup>2+</sup></b>              | <b>6.5</b>  | 686 | 31  | 252 | 0.27  | 117* | 2.42* |
|                                        |             |     |     | 306 | -0.04 | 128* | 2.36* |
|                                        |             |     |     | 607 | -0.06 |      |       |
| <b>[CuLH<sub>2</sub>]</b>              | <b>8.0</b>  | 637 | 72  | 251 | 1.51  | 147  | 2.24  |
|                                        |             |     |     | 310 | -0.22 | 173  | 2.28  |
|                                        |             |     |     | 348 | 0.08  |      |       |
|                                        |             |     |     | 611 | -0.37 |      |       |
| <b>[CuLH<sub>4</sub>]<sup>2-</sup></b> | <b>11.0</b> | 529 | 137 | 243 | 6.19  | 196  | 2.19  |
|                                        |             |     |     | 284 | -0.77 |      |       |
|                                        |             |     |     | 314 | 0.28  |      |       |
|                                        |             |     |     | 510 | -1.58 |      |       |
| <i>Ac-HAAAAM-NH<sub>2</sub></i>        |             |     |     |     |       |      |       |
| <b>[CuL]<sup>2+</sup></b>              | <b>6.5</b>  | 680 | 38  | 250 | 0.34  | 118  | 2.42  |
|                                        |             |     |     | 307 | -0.08 | 133  | 2.28  |
|                                        |             |     |     | 345 | 0.04  |      |       |
|                                        |             |     |     | 602 | -0.10 |      |       |
| <b>[CuLH<sub>2</sub>]</b>              | <b>8.5</b>  | 631 | 108 | 251 | 1.86  | 145  | 2.24  |
|                                        |             |     |     | 306 | -0.33 |      |       |
|                                        |             |     |     | 345 | 0.24  |      |       |
|                                        |             |     |     | 608 | -0.57 |      |       |
| <b>[CuLH<sub>4</sub>]<sup>2-</sup></b> | <b>11.0</b> | 526 | 172 | 244 | 5.43  | 200  | 2.19  |
|                                        |             |     |     | 286 | -0.44 |      |       |
|                                        |             |     |     | 311 | 0.32  |      |       |
|                                        |             |     |     | 511 | -1.61 |      |       |

<sup>(a)</sup> Data from M. Remelli, M. Donatoni, R. Guerrini, A. Janicka, P. Pretegianni and H. Kozłowski, Dalton Tran. 2005, 2876-2885.

<sup>(b)</sup> Data from E. Gralka, D. Valensin, E. Porciatti, C. Gajda, E. Gaggelli, G. Valensin, W. Kamysz, R. Nadolny, R. Guerrini, D. Bacco, M. Remelli and H. Kozłowski, Dalton Trans. 2008, 5207-5219

\* pH = 7.0

n. d. = not determined

**Fig. S1** – Distribution diagram for the system  $\text{Cu}^{\text{II}}/\text{hPrP}_{106-113}$  at  $T = 298.2\text{ K}$  and  $I = 0.1\text{ M}$ .  
 $[\text{Cu}^{\text{II}}]_{\text{tot}} = 0.1\text{ mM}$ ;  $[\text{L}]_{\text{tot}} = 1.0\text{ mM}$

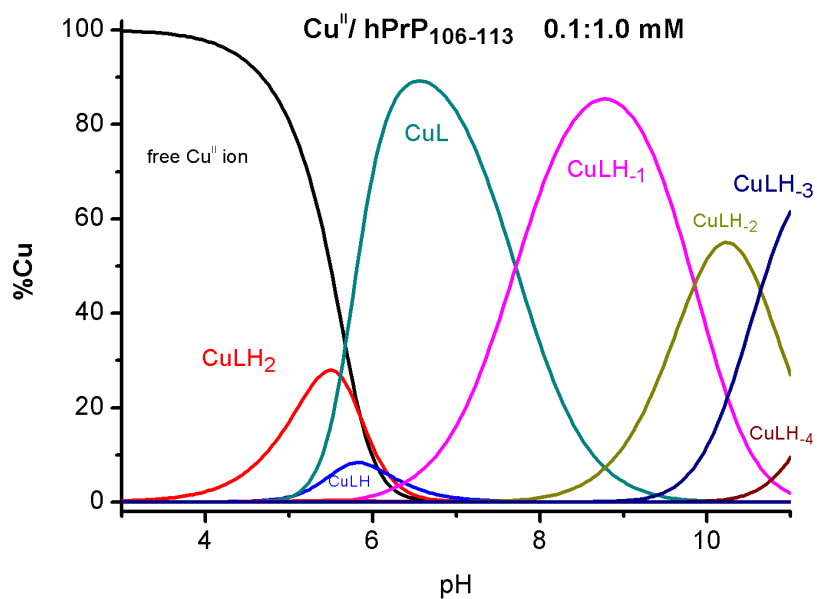

**Fig. S2** – Distribution diagram for the system  $\text{Cu}^{\text{II}}/\text{hPrP}_{106-113}$  at  $T = 298.2\text{ K}$  and  $I = 0.1\text{ M}$ .  
 $[\text{Cu}^{\text{II}}]_{\text{tot}} = 0.2\text{ mM}$ ;  $[\text{L}]_{\text{tot}} = 1.0\text{ mM}$

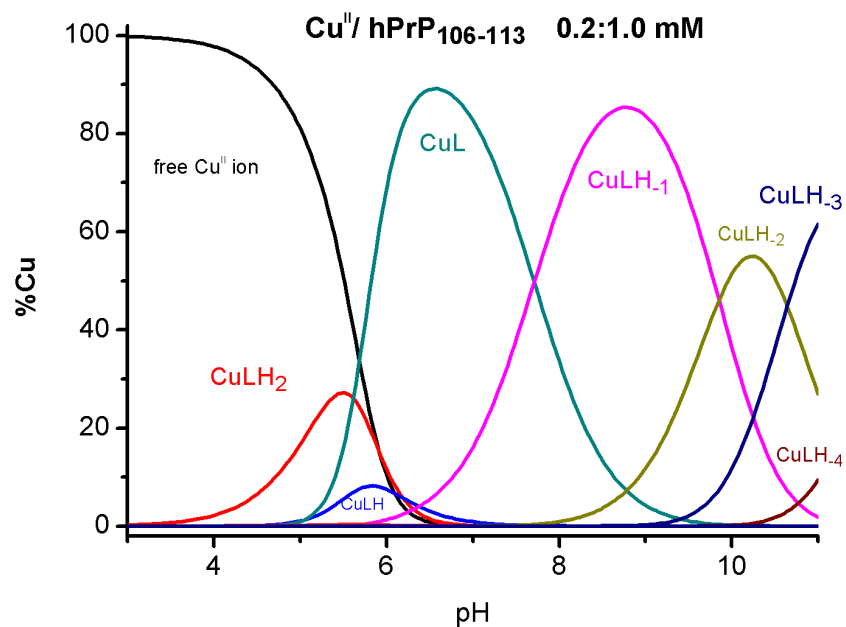

**Fig. S3** – Selective region of 2D NMR  $^1\text{H}$ - $^1\text{H}$  TOCSY spectra (M112*n*-Leu)hPrP<sub>106-113</sub> 1 mM, pH 6.5, T 298 K, in the absence (black contours) and in the presence of 0.2 Cu(II) equivalents (green contours).

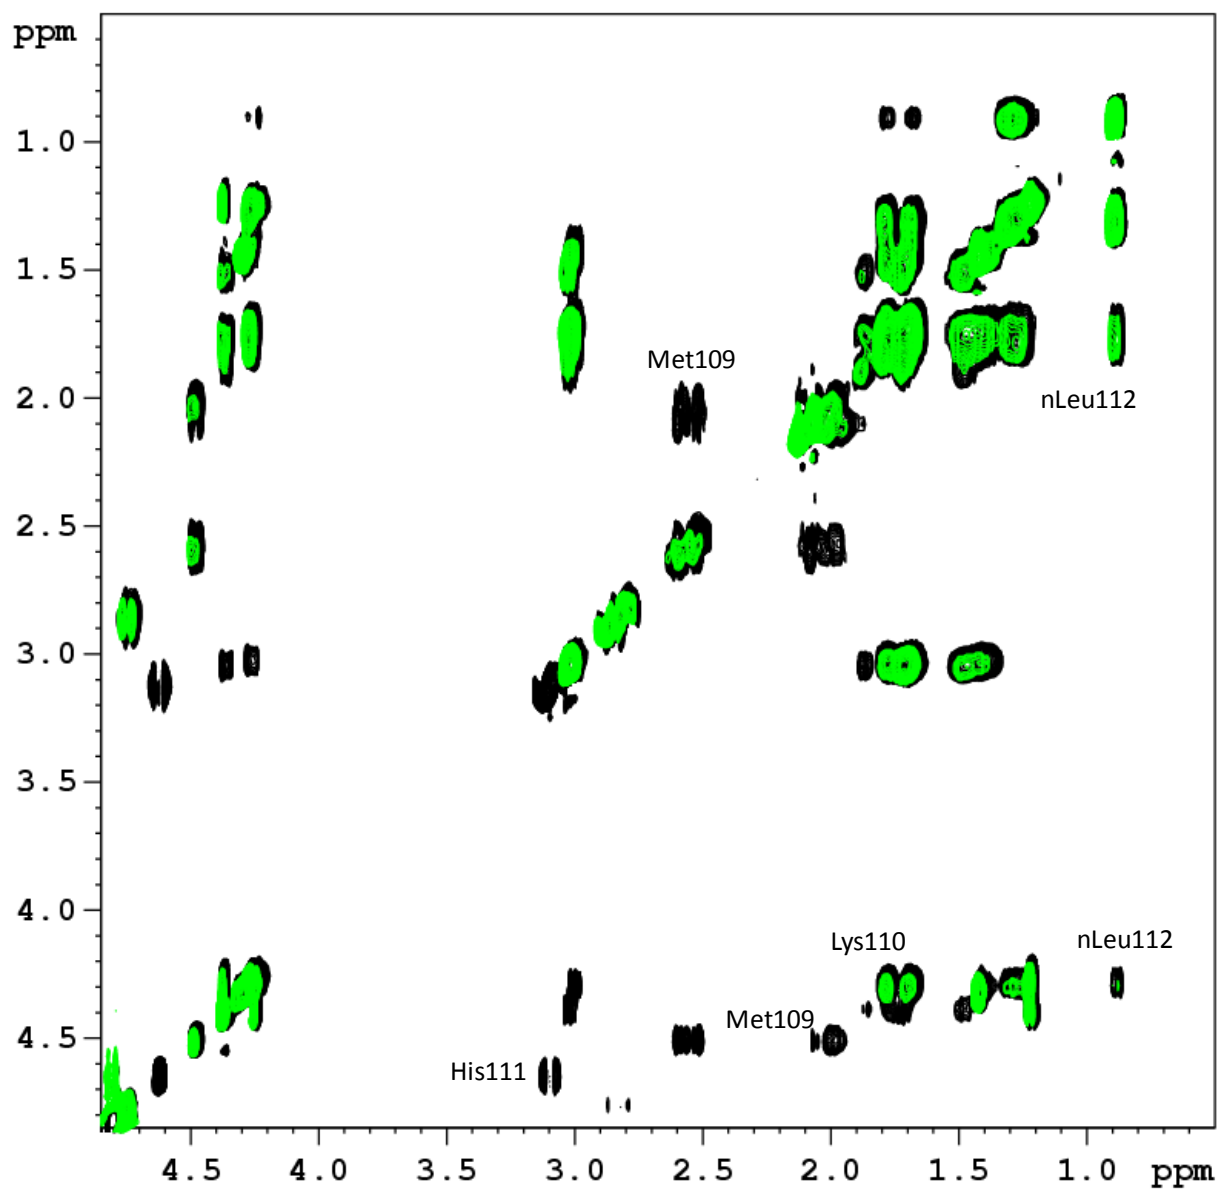

**Fig. S4** – Distribution diagram for the system  $\text{Cu}^{\text{II}}$ / hPrP<sub>106-113</sub> at  $T = 298.2 \text{ K}$  and  $I = 0.1 \text{ M}$ .  
 $[\text{Cu}^{\text{II}}]_{\text{tot}} = 0.9 \text{ mM}$ ;  $[\text{L}]_{\text{tot}} = 1.0 \text{ mM}$

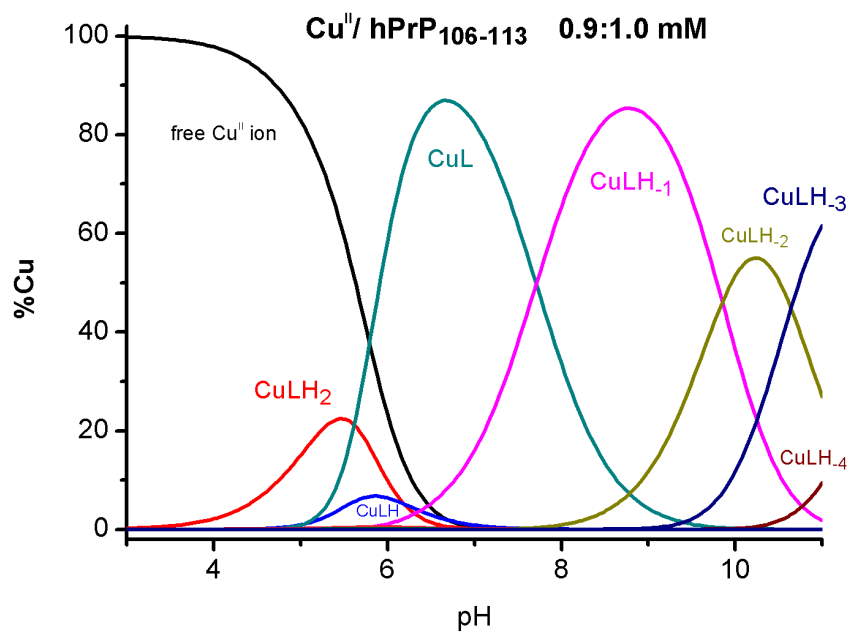

**Fig. S5** – Experimental thermogram obtained by isoperibolic calorimetry, titrating an alkaline solution of  $\text{Cu}^{\text{II}}$ / Ac-H(*n*-L)AGA with standard  $\text{HNO}_3$ .  
 $T = 298.2 \text{ K}$  and  $I = 0.1 \text{ M}$ .  $[\text{Cu}^{\text{II}}]_{\text{tot}} = 1.3 \text{ mM}$ ;  $[\text{L}]_{\text{tot}} = 1.4 \text{ mM}$

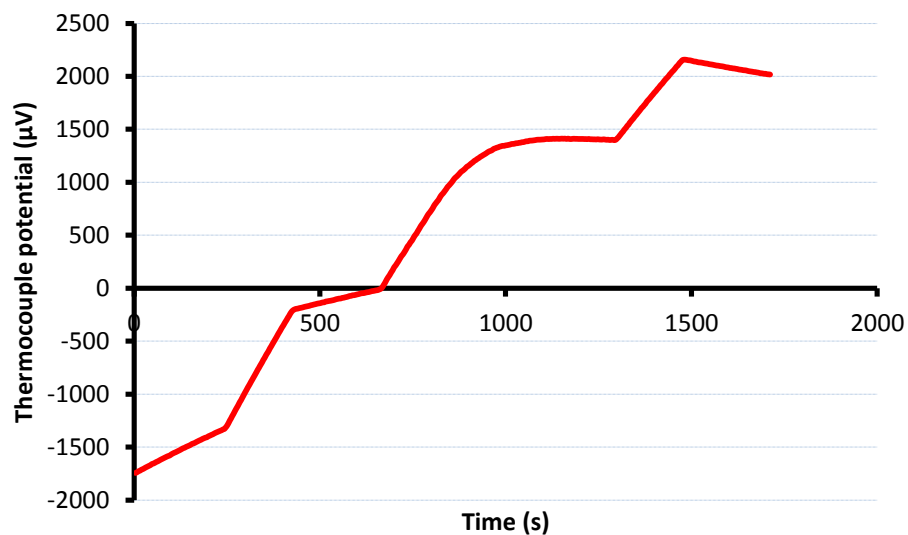

**Fig. S6a** - CD spectra for the system  $\text{Cu}^{\text{II}} / (\text{M109n-Leu})\text{PrP}_{106-113}$ , at  $T = 298.2 \text{ K}$ .  
 $[\text{Cu}^{\text{II}}]_{\text{tot}} = 2.0 \text{ mM}$ ;  $[\text{L}]_{\text{tot}} = 2.0 \text{ mM}$ .

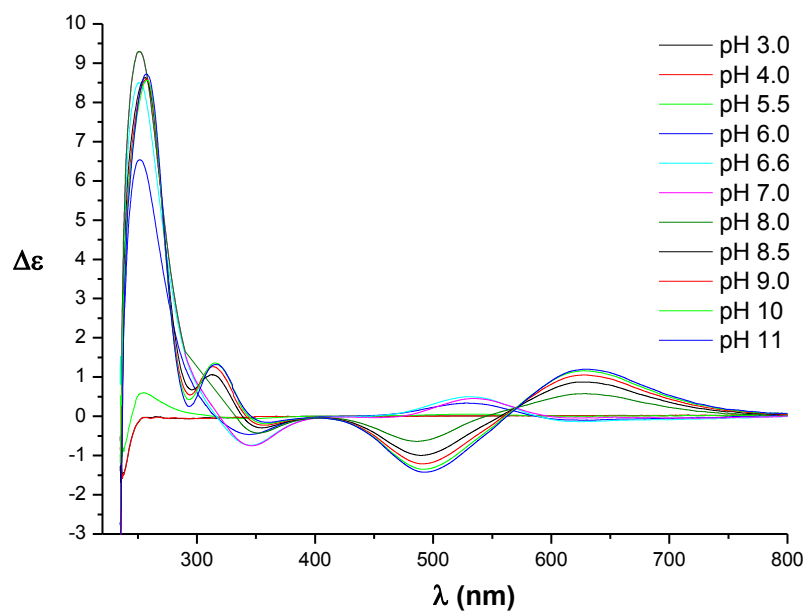

**Fig. S6b** - EPR spectra for the system  $\text{Cu}^{\text{II}} / (\text{M109n-Leu})\text{PrP}_{106-113}$ .  
 $[\text{Cu}^{\text{II}}]_{\text{tot}} = 2.0 \text{ mM}$ ;  $[\text{L}]_{\text{tot}} = 2.0 \text{ mM}$ .

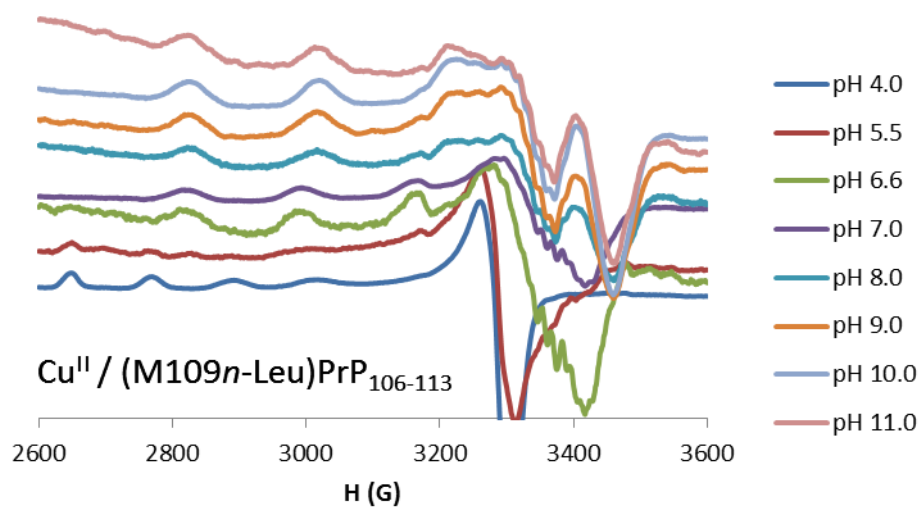



**Fig. S7a** - CD spectra for the system  $\text{Cu}^{\text{II}} / (\text{M109},112n\text{-Leu})\text{PrP}_{106-113}$ , at  $T = 298.2 \text{ K}$ .  
 $[\text{Cu}^{\text{II}}]_{\text{tot}} = 1.5 \text{ mM}$ ;  $[\text{L}]_{\text{tot}} = 1.5 \text{ mM}$ .

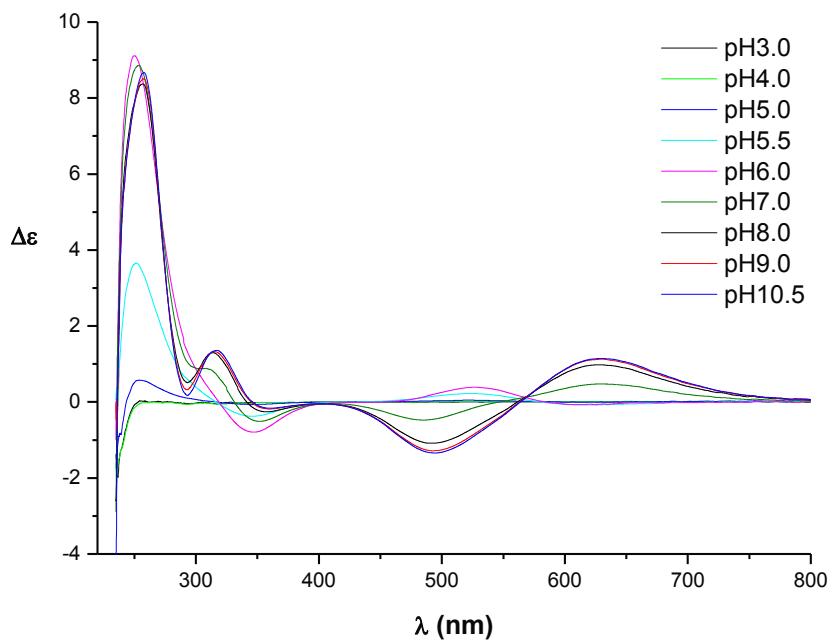

**Fig. S7b** – EPR spectra for the system  $\text{Cu}^{\text{II}} / (\text{M109},112n\text{-Leu})\text{PrP}_{106-113}$ .  
 $[\text{Cu}^{\text{II}}]_{\text{tot}} = 1.0 \text{ mM}$ ;  $[\text{L}]_{\text{tot}} = 1.0 \text{ mM}$ .

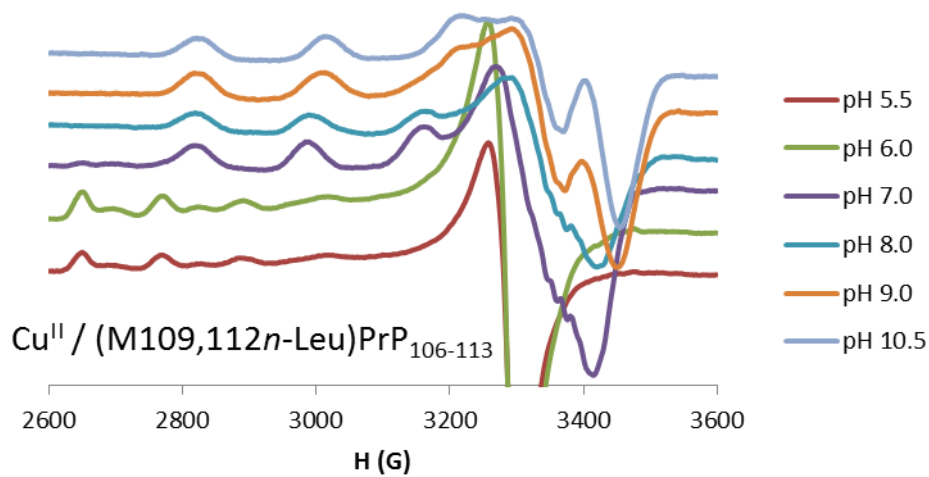

**Fig. S8a** - CD spectra for the system  $\text{Cu}^{\text{II}}$  / Ac-H(*n*-L)AGA, at  $T = 298.2$  K.  
 $[\text{Cu}^{\text{II}}]_{\text{tot}} = 1.0$  mM;  $[\text{L}]_{\text{tot}} = 1.0$  mM.

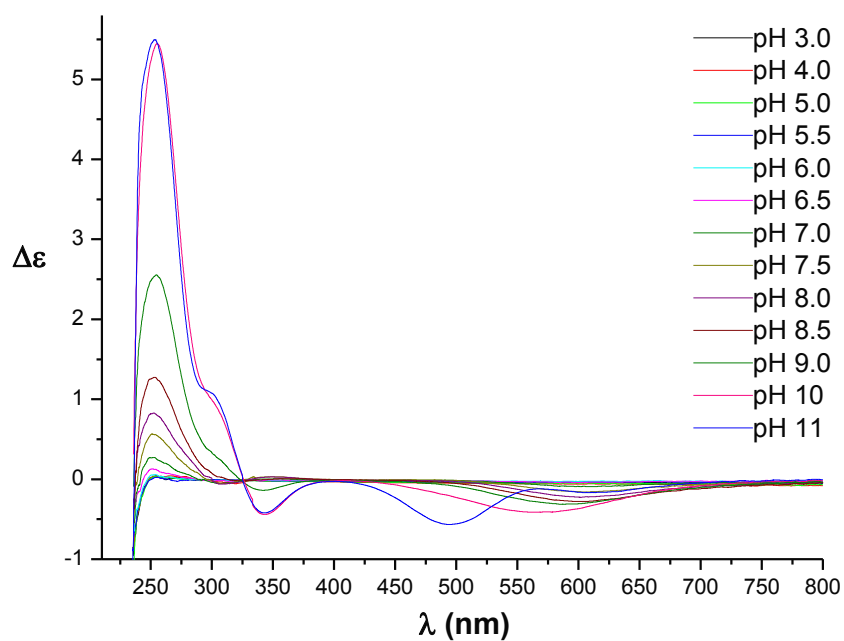

**Fig. S8b** - EPR spectra for the system  $\text{Cu}^{\text{II}}$  / Ac-H(*n*-L)AGA.  
 $[\text{Cu}^{\text{II}}]_{\text{tot}} = 1.0$  mM;  $[\text{L}]_{\text{tot}} = 1.0$  mM.

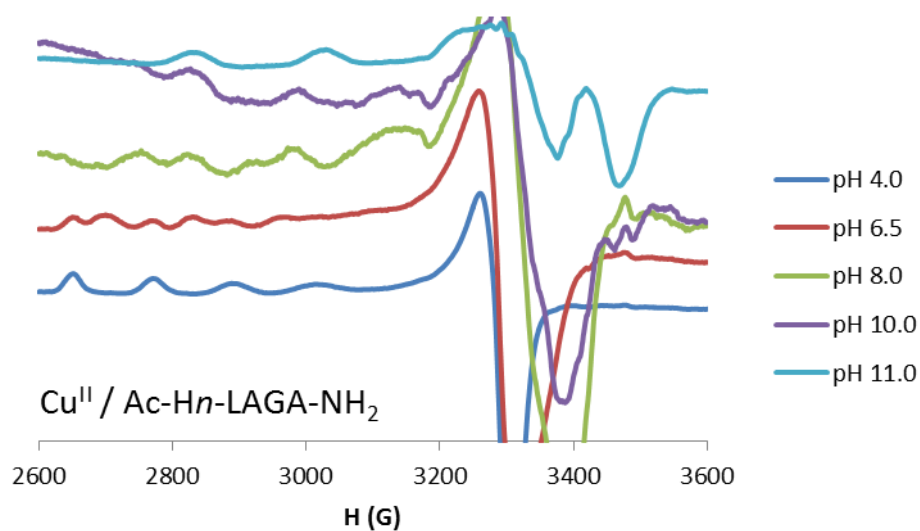

**Fig. S9a** - CD spectra for the system  $\text{Cu}^{\text{II}}$  / Ac-HMAAA, at  $T = 298.2 \text{ K}$ .  
 $[\text{Cu}^{\text{II}}]_{\text{tot}} = 3.0 \text{ mM}$ ;  $[\text{L}]_{\text{tot}} = 3.0 \text{ mM}$ .

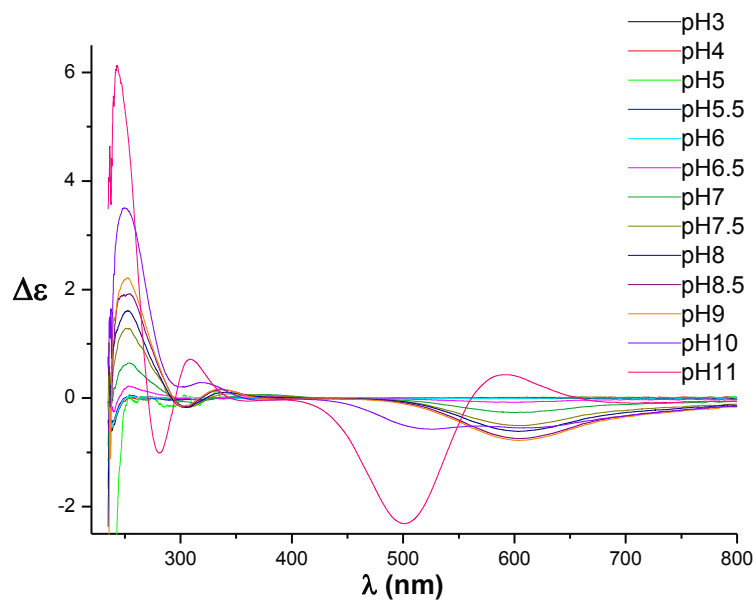

**Fig. S9b** - EPR spectra for the system  $\text{Cu}^{\text{II}}$  / Ac-HMAAA.  
 $[\text{Cu}^{\text{II}}]_{\text{tot}} = 2.0 \text{ mM}$ ;  $[\text{L}]_{\text{tot}} = 2.0 \text{ mM}$ .

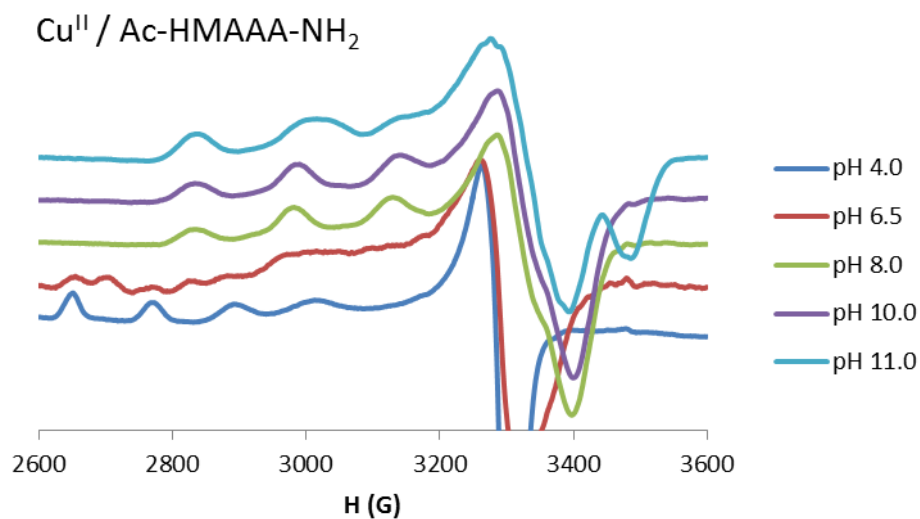

**Fig. S10a** - CD spectra for the system  $\text{Cu}^{\text{II}}$  / Ac-HAMAA, at  $T = 298.2 \text{ K}$ .  
 $[\text{Cu}^{\text{II}}]_{\text{tot}} = 3.0 \text{ mM}$ ;  $[\text{L}]_{\text{tot}} = 3.0 \text{ mM}$ .

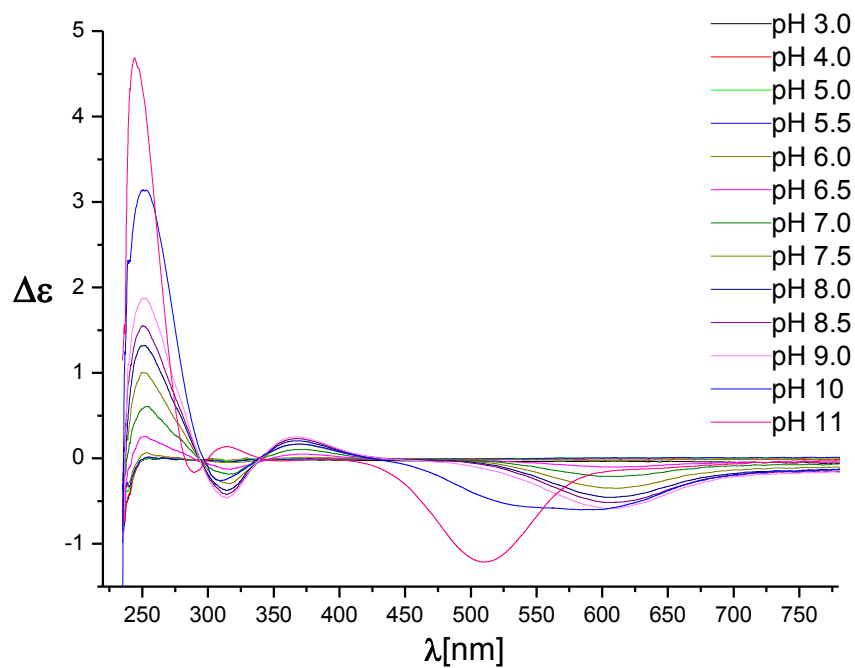

**Fig. S10b** - EPR spectra for the system  $\text{Cu}^{\text{II}}$  / Ac-HAMAA.  
 $[\text{Cu}^{\text{II}}]_{\text{tot}} = 3.0 \text{ mM}$ ;  $[\text{L}]_{\text{tot}} = 3.0 \text{ mM}$ .

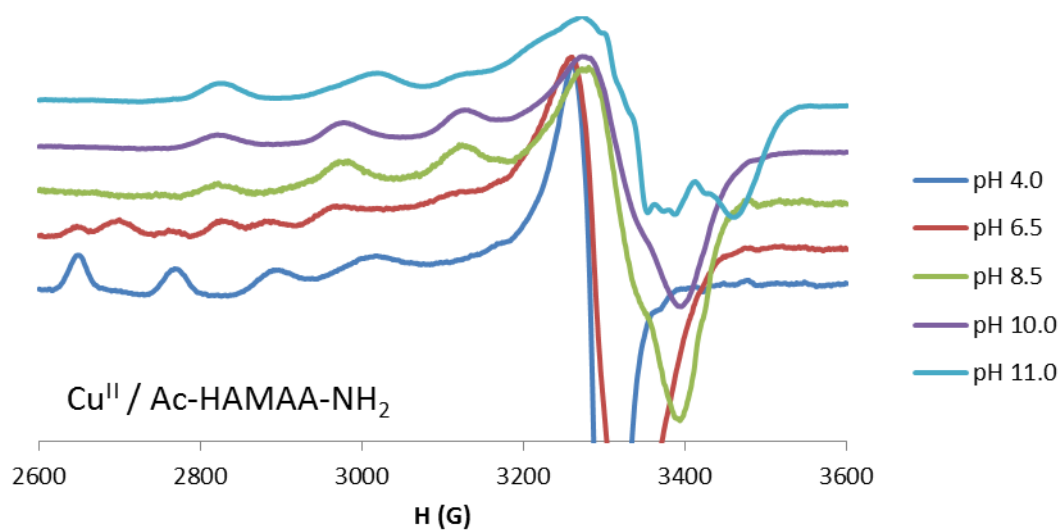

**Fig. S11a** - CD spectra for the system  $\text{Cu}^{\text{II}}$  / Ac-HAAMA, at  $T = 298.2 \text{ K}$ .  
 $[\text{Cu}^{\text{II}}]_{\text{tot}} = 3.0 \text{ mM}$ ;  $[\text{L}]_{\text{tot}} = 3.0 \text{ mM}$ .

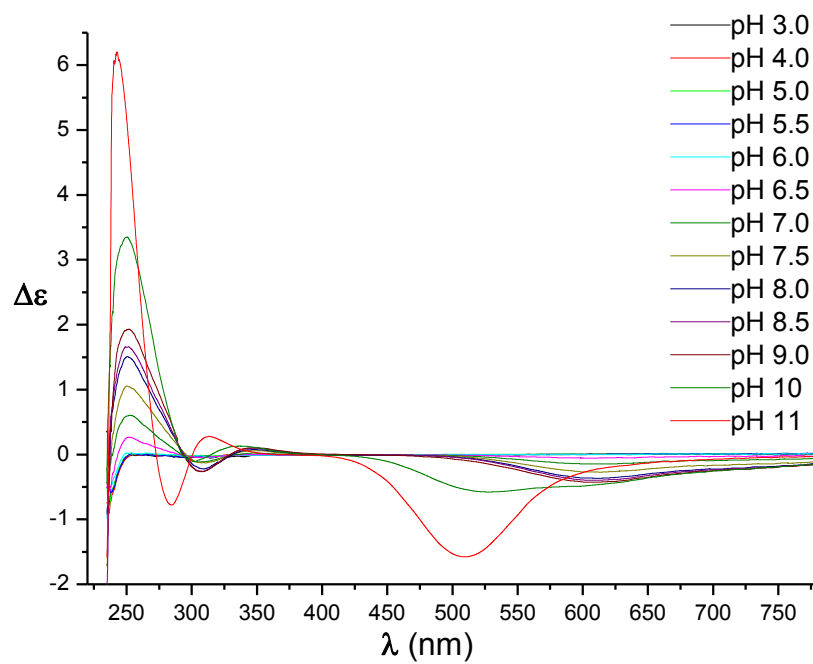

**Fig. S11b** - EPR spectra for the system  $\text{Cu}^{\text{II}}$  / Ac-HAAMA.  
 $[\text{Cu}^{\text{II}}]_{\text{tot}} = 2.0 \text{ mM}$ ;  $[\text{L}]_{\text{tot}} = 2.0 \text{ mM}$ .

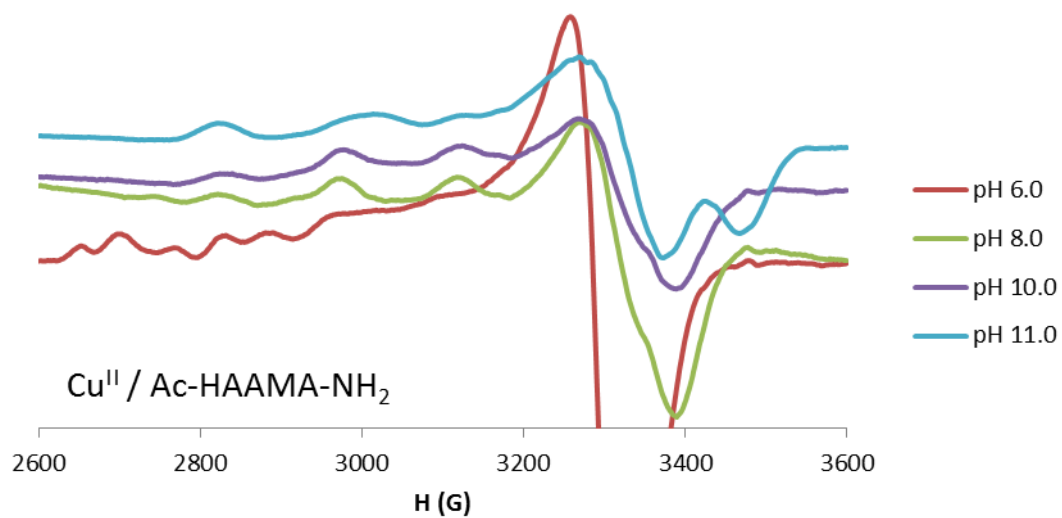

$\text{Cu}^{\text{II}}$  / Ac-HAAMA- $\text{NH}_2$

**Fig. S12a** - CD spectra for the system  $\text{Cu}^{\text{II}}$  / Ac-HAAAM, at  $T = 298.2 \text{ K}$ .  
 $[\text{Cu}^{\text{II}}]_{\text{tot}} = 3.0 \text{ mM}$ ;  $[\text{L}]_{\text{tot}} = 3.0 \text{ mM}$ .

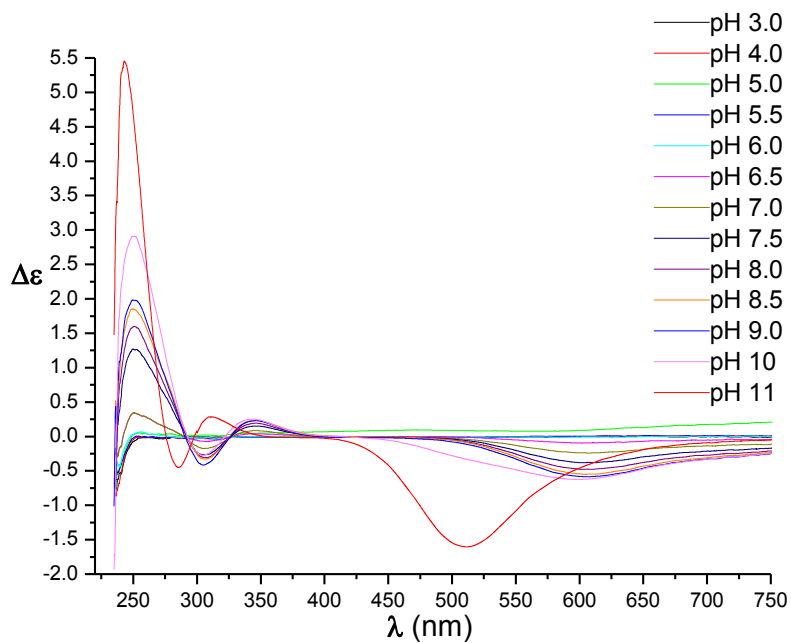

**Fig. S12b** - EPR spectra for the system  $\text{Cu}^{\text{II}}$  / Ac-HAAAM.  
 $[\text{Cu}^{\text{II}}]_{\text{tot}} = 3.0 \text{ mM}$ ;  $[\text{L}]_{\text{tot}} = 3.0 \text{ mM}$ .

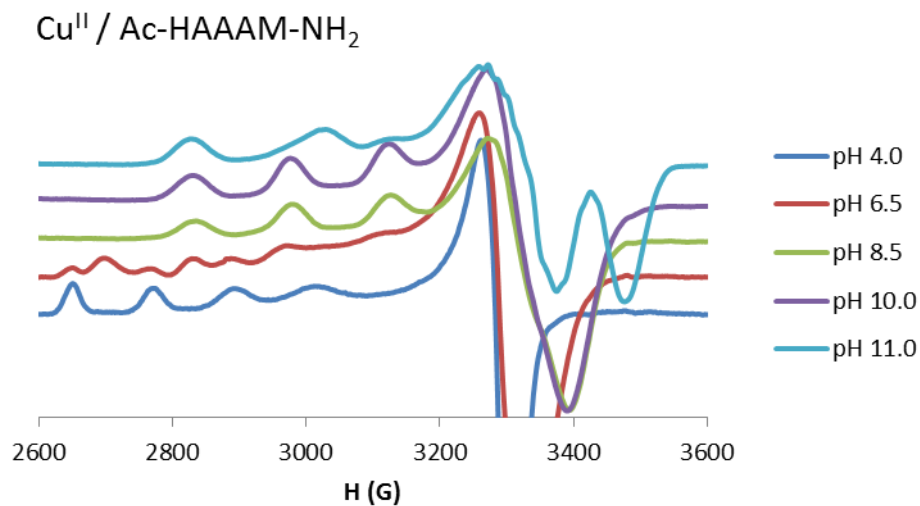

Supplement: c2mt20060k.pdf [file c2mt20060k.pdf]
